# Supplementary material for: Dynamics in benthic community composition and influencing factors in an upwelling-exposed coral reef on the Pacific coast of Costa Rica
Source: PeerJ. 2015 Nov 24;3:e1434. doi: 10.7717/peerj.1434 (PMC4662590; doi:10.7717/peerj.1434)
Supplement: Supplemental Information 1 [file peerj-03-1434-s001.xlsx]

## Sheet: benthos
Date	Pocillopora	dead	CCA	Zoanthids	Caulerpa	Turf	Sand	Rubble	Cyano
2013-04-21	22	0	12	0.05	3.25	62.5	0.2	0	0			0	not estimated because no occurence
2013-04-29	21.6	0	9.8	0	2.2	65.2	0.2	0	0
2013-05-07	22	0	15	0	1.72	60.68	0.4	0	0.2
2013-05-20	24	0	16.7	0.1	0.35	58.1	0.4	0	0.35
2013-05-27	25	0	15.95	0.05	0.2	58	0.4	0	0.4
2013-06-11	24.4	0	14.8	0.1	0.25	59.75	0.5	0	0.2
2013-06-17	27	0	25	0.02	0.12	47.36	0.45	0	0.05
2013-06-24	31	0	31.85	0.1	0.3	35.3	0.45	0	1
2013-07-01	29.8	0	29.5	0.1	0.5	37.9	0.6	0	1.6
2013-07-08	31.4	0.15	33.9	0.1	0.6	31.65	0.6	0	1.6
2013-07-15	32.8	0.4	29.1	0.1	1.4	34.8	0.5	0	0.9
2013-07-29	32.2	0.2	27.7	0.1	3.2	34.8	0.5	0	1.3
2013-08-05	33.8	0.1	26.7	0.1	5	32.9	0.6	0	0.8
2013-08-12	35	0.1	29.2	0.1	4	30.3	0.5	0	0.8
2013-08-25	33.6	0.1	30	0.1	1.2	34.5	0.5	0	0
2013-09-02	37.4	0	30.8	0.1	0.4	30.8	0.5	0	0
2013-09-09	37.6	0.1	29.25	0.1	0.6	31.85	0.5	0	0
2013-09-23	38.8	0	27.4	0.2	0.8	32.1	0.6	0	0.1
2013-09-30	38.6	0	28.6	0.2	1	30.9	0.6	0	0.1
2013-10-07	39.6	0	30.6	0.1	1.4	27.8	0.4	0	0.1
2013-10-14	40.8	0	30.4	0.1	2.2	25.9	0.6	0	0
2013-10-21	40.4	0	33.65	0.1	0.2	25.2	0.4	0	0.05
2013-10-28	43.2	0	35.2	0.1	0.3	20.8	0.35	0	0.05
2013-11-04	41.8	0.1	29.5	0.1	0.4	27.4	0.6	0	0.1
2013-11-11	42	0.2	29.8	0.1	0.2	26.4	0.7	0	0.6
2013-11-18	44.4	0.1	27.4	0.1	0.4	25.7	0.8	0.9	0.2
2013-11-25	43	0.2	27.6	0.1	0.2	26.5	0.9	1.4	0.1
2013-12-02	42.2	0.25	31.4	0.1	0.2	22.95	0.9	1.8	0.2
2013-12-09	42.2	0.2	30	0.1	0.4	23.4	1	2.4	0.3
2013-12-16	43	0.1	28.4	0.1	0.4	25	1	2	0
2013-12-23	44.2	0.2	28.7	0.05	0.7	23.45	1.1	1.6	0
2013-12-30	43.8	0.2	29.8	0.05	1	21.95	1.2	1.6	0.4
2014-01-06	44.8	0.15	27.6	0.05	1.4	23	1.2	1.8	0
2014-01-14	45.8	0	27.35	0.05	1.8	21.8	1.2	2	0
2014-01-20	46	0	25.4	0.05	1.4	24.15	1	1.8	0.2
2014-01-27	47.6	0	26.4	0.05	0.7	22.25	1	1.8	0.2
2014-02-03	46.4	0	24.6	0.05	0.9	25.05	1	1.8	0.2
2014-02-10	46.2	0	25	0.05	0.6	25.15	1.2	1.8	0
2014-02-17	46.8	0	23.8	0	0.8	25.6	1	1.8	0.2
2014-02-24	47	0.1	25.4	0	1.4	21.4	0.8	3	0.9
2014-03-03	47.8	0	24.2	0	1.8	21.7	0.9	3	0.6
2014-03-10	48.6	0	21.4	0	2	22.5	1	2.4	2.1
2014-03-17	46.8	0	22.3	0	2.4	22.7	1.2	2.2	2.4
2014-03-24	48.8	0	21.3	0	1.8	23	1.2	2.6	1.3
2014-03-31	48.6	0	20	0	0.6	23.8	1.4	4	1.6
2014-04-07	49.6	0	18.2	0	0.4	24.3	1.1	4.8	1.6
2014-04-14	50.6	0	17	0	0.2	25	1	4	2.2
2014-04-21	51.2	0	18.8	0	0.4	24.3	1.4	2.8	1.1

## Sheet: environmental conditions
Date	Temperature [°C]	Phosphate [µmol L-1]	SE phosphate (n=3)	Ammonia [µmol L-1]	SE Ammonia (n=3)	Nitrate [µmol L-1]	SE Nitrate (n=3)
2013-04-21	28.4331	NA	NA	NA	NA	NA	NA
2013-04-29	28.9989	0.294241	0.0159591	0.296646	0.061127	NA	NA
2013-05-07	29.55	0.358077	0.0159591	0.459568	0.0115384	NA	NA
2013-05-20	29.5346	0.374036	0.0319181	1.30682	0.0335292	NA	NA
2013-05-27	29.8326	0.214446	0.0638362	0.570772	0.0135315	NA	NA
2013-06-11	29.3303	0.326159	0.125662	0.371171	0.0295683	0.32429	0.192156
2013-06-17	28.828	0.267642	0.0531969	0.393671	0.00811042	0.424169	0.167949
2013-06-24	26.988	0.522987	0.0106394	0.582419	0.0377756	0.749407	0.189326
2013-07-01	28.8111	0.278282	0.0184279	0.542045	0.0205499	0.708317	0.199957
2013-07-08	29.0943	0.278282	0	0.612668	0.0555127	0.458033	0.0798273
2013-07-15	28.8573	0.288921	0.0106394	0.25676	0.0218876	0.460833	0.125713
2013-07-29	28.8692	0.368145	0.0631978	0.891917	0.00933348	0.483906	0.121339
2013-08-05	28.4888	0.161282	0	0.501918	0.0595041	0.001	0.265786
2013-08-12	29.1192	0.202654	0	0.562717	0.0123843	0.687955	0.413784
2013-08-25	28.841	0.175073	0.0364873	0.322477	0.00759011	0.001	0.111133
2013-09-02	29.0537	0.340563	0.0601131	0.589147	0.0176072	0.989937	0.425586
2013-09-09	29.3082	0.259516	0	0.735978	0.0265866	0.62659	0.0799342
2013-09-23	28.4165	0.443406	0	0.941847	0.0170668	0.695811	0.138582
2013-09-30	28.3159	0.259516	0.0265422	0.536485	0.0332219	0.001	0.529035
2013-10-07	28.573	0.152247	0.0405439	0.41594	0.000510596	0.662082	0.303965
2013-10-14	27.1896	0.305812	0.0546344	0.476214	0.020515	0.362445	0.253295
2013-10-21	28.656	0.114926	0.0166345	0.31702	0.0795984	0.390168	0.222102
2013-10-28	29.1054	0.320965	0.0262455	0.878476	0.0701364	0.964335	0.115445
2013-11-04	28.9136	0.139131	0.0262455	0.469226	0.0662904	0.210956	0.107109
2013-11-11	28.9486	0.214895	0.0151528	0.41929	0.0126911	0.0963139	0.146546
2013-11-18	28.3567	NA	NA	0.577556	0.0271311	0.395544	0.205436
2013-11-25	27.9313	0.31454	0.0166345	0.711068	0.00998753	0.557418	0.114873
2013-12-02	25.3976	0.497519	0	0.774471	0.0324253	0.674588	0.25144
2013-12-09	27.9708	0.264636	0.0166345	0.630981	0.0315803	0.196687	0.05181
2013-12-16	28.4037	0.248002	0.0288118	0.495406	0.0483979	0.154424	0.178399
2013-12-23	28.4488	0.148195	0.0288118	0.371749	0.00499113	0.001	0.308434
2013-12-30	28.625	0.181464	0.0166345	0.331069	0.0171157	0.187882	0.293438
2014-01-06	28.85	0.0476987	0.0314685	0.508461	0.0148739	0.214704	0.0866263
2014-01-14	27.9957	0.0581882	0.020979	0.436087	0.0180697	0.217687	0.0703686
2014-01-20	26.551	0.0372092	0.020979	0.253442	0.0463501	0.001	0.326901
2014-02-03	27.1443	0.205041	0.062937	1.6454	0.0352465	0.437265	0.258163
2014-02-10	23.6385	0.666579	0.041958	0.636448	0.0717209	3.52208	0.16981
2014-02-17	21.6222	1.29595	0.020979	2.53138	0.0547824	6.73762	0.386881
2014-02-24	25.031	0.330915	0.0363367	1.3587	0.00749423	0.874258	0.101662
2014-03-03	24.0695	0.770827	0.0218344	1.03118	0.0237173	3.05285	0.307303
2014-03-10	28.1672	0.13763	0.0378183	0.957869	0.0283584	0.229746	0.188722
2014-03-17	27.4424	0.0939611	0.0218344	0.366467	0.0469365	0.445527	0.352726
2014-03-24	26.6165	0.0939611	0.0218344	0.547284	0.0181886	0.202964	0.105749
2014-03-31	25.6695	0.536191	0.0187642	1.05454	0.0277547	1.329	0.153303
2014-04-07	28.1143	0.31102	0.0496455	0.636448	0.0255563	0.541841	0.155813
2014-04-14	28.228	0.329784	0	0.877047	0.0360893	1.22171	0.155273
2014-04-21	28.2291	NA	NA	0.742215	0.0233201	0.0307542	0.267902

## Sheet: sea urchins
Abundance
Month	D. mexicanum [ind m-2]	SE D. mexicanum (n=5)	E. thourausii [ind m-2]	SE E. thourausii (n=5)
2013-04-01	7.69	2.47944	0.23	0.106771
2013-05-01	7.71	1.98956	0.12	0.0463681
2013-06-01	4.25	1.23055	0.36	0.0886002
2013-07-01	5.54	1.954	0.14	0.0291548
2013-08-01	6.68	1.08139	0.2	0.151658
2013-09-01	5.5	1.00958	0.33	0.127083
2013-10-01	5.41	0.938041	0.18	0.125518
2013-11-01	4.58	0.906449	0.06	0.0291548
2013-12-01	3.96	0.894623	0.1	0.0474342
2014-01-01	3.93	0.751765	0.07	0.03
2014-02-01	5.09	0.75389	0.08	0.0406202
2014-03-01	4.35	0.887975	0.16	0.0696419
2014-04-01	4.31	0.794261	0.1	0.0316228

## Sheet: fish
Abundance			2013-11-01		2013-12-01		2014-01-01		2014-02-01		2014-03-01
Common Name	Scientific Name	Trophic group	ind m-2	SE (n=5)	ind m-2	SE (n=5)	ind m-2	SE (n=5)	ind m-2	SE (n=5)	ind m-2	SE (n=5)
Ballonfish	Diodon holocanthus	Carnivore	0.0213333	0.00573488	0.0173333	0.00266667	0.0146667	0.00326599	0.0186667	0.00533333	0.00666667	0.00421637
Guineafowl Puffer	Arothron meleagris	Carnivore (Corallivore)	0.0226667	0.00266667	0.00133333	0.00133333	0.00533333	0.00133333	0	0	0.00133333	0.00133333
Stripebelly Puffer	Arothron hispidus	Carnivore	0.004	0.00266667	0	0	0	0	0	0	0	0
Longnose Puffer	Sphoeroides lobatus	Carnivore	0	0	0	0	0	0	0	0	0	0
Spotted Sharpnose Puffer	Canthigaster punctatissima	Carnivore	0	0	0	0	0	0	0	0	0	0
Honeycomp Puffer	Canthigaster janthinoptera	Carnivore	0	0	0	0	0	0	0	0	0	0
Blunthead Triggerfish	Pseudobalistes naufragium	Carnivore	0	0	0.00266667	0.00266667	0	0	0	0	0	0
Orangeside Triggerfish	Sufflamen verres	Carnivore	0.104	0.0139204	0.181333	0.0643394	0.128	0.0366606	0.032	0.0127192	0.0266667	0.00760117
Panamic Sergeant Major	Abudefduf troschelii	Planktivore	0.012	0.00742369	0.0666667	0.0298142	0.008	0.00326599	0.008	0.00646357	0.0466667	0.0450185
Acapulco Damselfish	Stegastes acapulcoensis	Herbivore	0.117333	0.0169444	0.213333	0.034254	0.0266667	0.0111555	0.0333333	0.00632456	0.0386667	0.0106249
Night Sergeant	Abudefduf concolor	Planktivore	0.0226667	0.0125786	0.00933333	0.00498888	0	0	0.00133333	0.00133333	0.00133333	0.00133333
Giant Damselfish	Microspathodon dorsalis	Herbivore	0	0	0	0	0	0	0	0	0.00666667	0.00421637
Scissortail Chromis	Chromis atrilobata	Planktivore	0.00133333	0.00133333	0.666667	0.421637	0	0	0	0	0	0
Barber Fish	Johnrandallia nigrirostris	Carnivore	0.0346667	0.0095219	0.0413333	0.0244404	0.036	0.0077746	0.0146667	0.00489898	0.0373333	0.0218683
Threebanded Butterflyfish	Chaetodon humeralis	Carnivore	0.0386667	0.0223507	0.00666667	0.00421637	0	0	0.004	0.00163299	0.064	0.0343576
Cortez Angelfish	Pomacanthus zonipectus	Carnivore	0.004	0.00163299	0.00933333	0.004	0.00133333	0.00133333	0.004	0.00163299	0.004	0.00163299
King Anglefish	Holacanthus passer	Carnivore	0.00666667	0.00516398	0.008	0.00533333	0.00266667	0.00266667	0.004	0.00266667	0.00666667	0.00421637
Sunset Wrasse	Thalassoma grammaticum	Carnivore	0.0306667	0.0132665	0	0	0	0	0.0226667	0.0210396	0.00266667	0.00266667
Cortez Rainbow Wrasse	Thalassoma lucasanum	Carnivore	0.008	0.00533333	0.00533333	0.00533333	0.028	0.0135647	0.0773333	0.0100222	0.216	0.0940591
Bluechin Parrotfish	Scarus ghobban	Herbivore	0.044	0.0118509	0.461333	0.0607874	0.178667	0.0586288	0.149333	0.0898047	0.396	0.0556018
Latin (or Cortez) Grunt	Haemulon steindachneri	Carnivore	0.122667	0.06551	0.0533333	0.0249444	0.116	0.114341	0.0226667	0.0162754	0.004	0.00266667
Panama Graysby	Cephalopholis panamensis	Predator	0.00133333	0.00133333	0	0	0	0	0	0	0.00666667	0.00421637
Flag Cabrilla	Epinephelus labriformis	Predator	0.00133333	0.00133333	0	0	0	0	0	0	0	0
Pacific Creole Fish	Paranthias colonus	Planktivore	0.00266667	0.00163299	0.00533333	0.00326599	0.02	0.02	0	0	0.00133333	0.00133333
Green Jack	Caranx caballus	Predator	0	0	0	0	0	0	0	0	0	0
Gafftopsail Pompano	Trachinotus rhodopus	Carnivore	0.0253333	0.0253333	0.00266667	0.00266667	0	0	0	0	0	0
Mexican Hogfish	Bodianus diplotaenia	Carnivore	0	0	0.0373333	0.0158605	0.00533333	0.00249444	0	0	0	0
Razor Surgeonfish	Prionurus laticlavius	Herbivore	0	0	0	0	0.0146667	0.0104137	0.00533333	0.00133333	0	0
Reef Cornetfish	Fistularia commersonii	Carnivore	0	0	0	0	0.0173333	0.00718022	0.028	0.0116237	0.004	0.004
			2013-11-01		2013-12-01		2014-01-01		2014-02-01		2014-03-01
		Predators	0.00266667		0		0		0		0.00666667
		Carnivores	0.422667		0.366667		0.354667		0.228		0.373333
		Planktivores	0.0386667		0.748		0.028		0.00933333		0.0493333
		Herbivores	0.161333		0.674667		0.22		0.188		0.441333
Biomass			2013-11-01		2013-12-01		2014-01-01		2014-02-01		2014-03-01
Common Name	Scientific Name	Trophic group	g/m²	SE	g/m²	SE	g/m²	SE	g/m²	SE	g/m²	SE
Ballonfish	Diodon holocanthus	Carnivore	9.56065	1.54347	6.25477	1.19556	6.29555	0.939564	10.6545	3.27665	1.50255	0.920202
Guineafowl Puffer	Arothron meleagris	Carnivore (Corallivore)	7.12112	1.07107	0.893368	0.893368	2.64257	0.86265	0	0	1.35482	1.35482
Stripebelly Puffer	Arothron hispidus	Carnivore	1.77477	1.12932	0	0	0	0	0	0	0	0
Longnose Puffer	Sphoeroides lobatus	Carnivore	0	0	0	0	0	0	0	0	0	0
Spotted Sharpnose Puffer	Canthigaster punctatissima	Carnivore	0	0	0	0	0	0	0	0	0	0
Honeycomp Puffer	Canthigaster janthinoptera	Carnivore	0	0	0	0	0	0	0	0	0	0
Blunthead Triggerfish	Pseudobalistes naufragium	Carnivore	0	0	2.79788	2.79788	0	0	0	0	0	0
Orangeside Triggerfish	Sufflamen verres	Carnivore	8.41365	0.963426	11.9581	2.84325	3.79209	1.27333	1.2046	0.54915	1.14068	0.160975
Panamic Sergeant Major	Abudefduf troschelii	Planktivore	0.968916	0.726004	2.74823	1.22905	0.424635	0.193776	0.709175	0.541693	2.30315	2.23508
Acapulco Damselfish	Stegastes acapulcoensis	Herbivore	6.60738	0.876574	7.87482	1.38957	1.03492	0.432938	1.38294	0.26119	1.50063	0.412348
Night Sergeant	Abudefduf concolor	Planktivore	1.21894	0.572994	0.669293	0.297835	0	0	0.0549647	0.0549647	0.0549647	0.0549647
Giant Damselfish	Microspathodon dorsalis	Herbivore	0	0	0	0	0	0	0	0	0.654211	0.444868
Scissortail Chromis	Chromis atrilobata	Planktivore	0.121331	0.121331	4.53871	2.87053	0	0	0	0	0	0
Barber Fish	Johnrandallia nigrirostris	Carnivore	3.08701	0.397624	4.03208	2.39091	1.66642	0.42134	0.840737	0.314818	1.62277	0.950547
Threebanded Butterflyfish	Chaetodon humeralis	Carnivore	3.99366	2.16096	0.459431	0.331133	0	0	0.178906	0.0730382	4.73458	3.31687
Cortez Angelfish	Pomacanthus zonipectus	Carnivore	0.632107	0.298932	2.69166	1.945	0.0590443	0.0590443	0.0861639	0.0544188	0.177133	0.0723142
King Anglefish	Holacanthus passer	Carnivore	0.889743	0.553405	3.68603	2.345	0.137877	0.137877	0.268593	0.182387	0.184412	0.134043
Sunset Wrasse	Thalassoma grammaticum	Carnivore	2.14044	0.908399	0	0	0	0	0.499458	0.463607	0.152786	0.152786
Cortez Rainbow Wrasse	Thalassoma lucasanum	Carnivore	0.393027	0.243806	0.151268	0.151268	0.427374	0.207042	1.59101	0.225386	4.27497	2.05935
Bluechin Parrotfish	Scarus ghobban	Herbivore	4.46505	1.02077	26.0924	6.06705	3.89181	0.834626	7.12726	3.70424	15.3781	2.44914
Latin (or Cortez) Grunt	Haemulon steindachneri	Carnivore	17.6163	9.75158	12.8662	6.20182	2.7976	2.7501	1.65035	1.0209	0.31769	0.211794
Panama Graysby	Cephalopholis panamensis	Predator	0.273846	0.273846	0	0	0	0	0	0	0.388389	0.240492
Flag Cabrilla	Epinephelus labriformis	Predator	0.280384	0.280384	0	0	0	0	0	0	0	0
Pacific Creole Fish	Paranthias colonus	Planktivore	0.176278	0.107948	0.756879	0.463492	0.757605	0.757605	0	0	0.0316911	0.0316911
Green Jack	Caranx caballus	Predator	0	0	0	0	0	0	0	0	0	0
Gafftopsail Pompano	Trachinotus rhodopus	Carnivore	0	0	0	0	0	0	0	0	0	0
Mexican Hogfish	Bodianus diplotaenia	Carnivore	0	0	5.42716	2.88738	0.828983	0.44161	0	0	0	0
Razor Surgeonfish	Prionurus laticlavius	Herbivore	0	0	0	0	0.962174	0.625898	0.920845	0.29591	0	0
Reef Cornetfish	Fistularia commersonii	Carnivore	0	0	0	0	0	0	4.20173	1.74428	0.122569	0.122569
			2013-11-01		2013-12-01		2014-01-01		2014-02-01		2014-03-01
		Predators	0.55423		0		0		0		0.388389
		Carnivores	55.6225		51.218		18.6475		21.1761		15.5849
		Planktivores	2.48546		8.71311		1.18224		0.76414		2.38981
		Herbivores	11.0724		33.9672		5.88891		9.43105		17.5329
Shannon-Wiener-Diversity			2.34		1.8		2.03		2.1		1.7
Eveness			0.78		0.62		0.75		0.77		0.59
